# Supplementary material
Source: publisher figshare collection journal article supplement (https://acs.figshare.com/ndownloader/files/7383175)
Supplement: Supplementary file 1 [file 7383175]

## Supporting Information

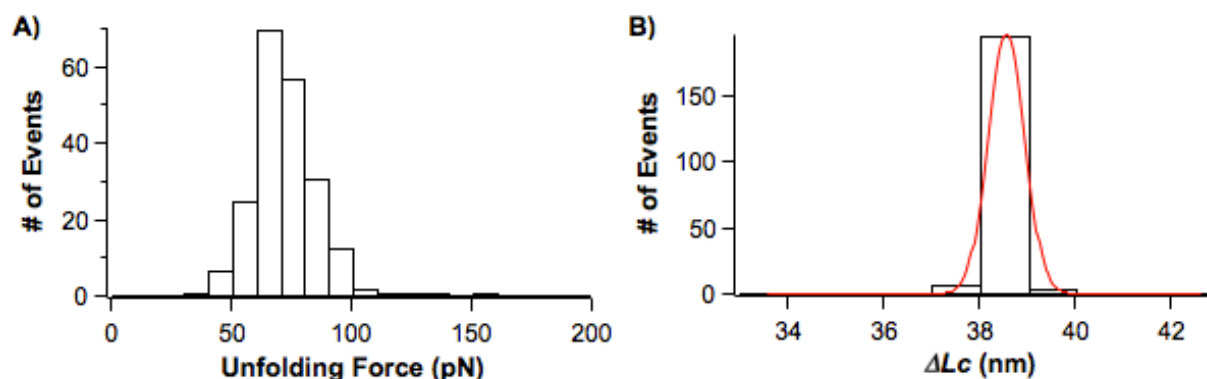

Figure S1. Mechanical unfolding of truncation variant SAK11-136. A) Unfolding force histogram of SAK11-136 at a pulling speed of 400 nm/s. B)  $\Delta Lc$  histogram of SAK11-136. Gaussian fit (red line) to the data yields  $\Delta Lc$  of  $38.0 \pm 0.5$  nm ( $n=208$ ).

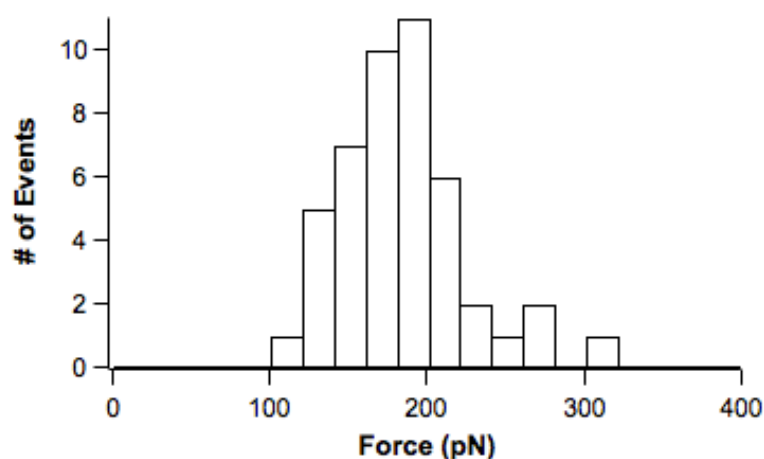

Figure S2. Unfolding force histogram of SK $\beta$ -A201W at a pulling speed of 400 nm/s. The average unfolding force of SK $\beta$ -A201W is  $167 \pm 45$  pN.
